# Supplementary material
Source: PubMed Central journal article supplement (PMC3602339)
Supplement: NIHMS419416-supplement-01.pdf [file NIHMS419416-supplement-01.pdf]

**SECTION 1: ATTITUDES AND OPINIONS**

**Directions:** To what extent do you agree or disagree with each the following statements: (Mark the ONE response that best applies)

|                                                                                                     | Strongly Disagree | Disagree | Neutral | Agree | Strongly Agree |
|-----------------------------------------------------------------------------------------------------|-------------------|----------|---------|-------|----------------|
| 1. If someone wants to kill themselves, there is not much anyone can do about it.                   |                   |          |         |       |                |
| 2. If a friend told me that he/she is thinking about committing suicide, I would keep it to myself. |                   |          |         |       |                |
| 3. Talking about suicide might give a person unwanted ideas about suicide                           |                   |          |         |       |                |
| 4. Asking a person whether they are feeling suicidal might cause them to do it.                     |                   |          |         |       |                |
| 5. People who try to kill themselves are “weak”.                                                    |                   |          |         |       |                |
| 6. People who talk about suicide can be ignored because people who talk about suicide don’t do it.  |                   |          |         |       |                |
| 7. Once a person becomes suicidal, they are suicidal forever.                                       |                   |          |         |       |                |
| 8. People who feel suicidal definitely want to die.                                                 |                   |          |         |       |                |
| 9. Most suicides occur with little or no warning                                                    |                   |          |         |       |                |

**SECTION 2: KNOWLEDGE**

**Directions:** For each of the following questions, please mark the answer or answers that best apply. Note that some questions may have more than one answer.

1. Which of the following are warning signs that a person may be thinking about suicide? (Mark ALL responses that apply)

- Giving away prized possessions
- Getting a new job
- Talking about death
- A drug or alcohol relapse
- Increased agitation or anxiety

2. Each year, the number of suicides in the U.S. is \_\_\_\_\_ the number of homicides/murders. **(Mark the ONE response that best applies)**

- about half as common as
- about equal to
- slightly more common than
- about twice as common as
- about five times as common as

3. Compared to people from the general population, people in drug/alcohol treatment are more likely to... **(Mark ALL responses that apply)**

- take risks such as fighting
- die by suicide.
- attempt suicide.
- think about suicide

4. Which of the following can help prevent addiction related suicide? **(Mark ALL responses that apply)**

- Using uppers like cocaine instead of opiates like heroin
- Completely avoiding drugs and alcohol
- Participating in addiction treatment such as a 12-step support group
- Talking to someone who can help find ways to deal with suicidal thoughts/feelings

5. Suicide is \_\_\_\_\_ leading cause of death among 15 to 24 year olds. **(Mark the ONE response that best applies)**

- the number 1
- the 3<sup>rd</sup>
- the 10<sup>th</sup>
- the 20<sup>th</sup>

6. Suicide is \_\_\_\_\_ leading cause of death among 25 to 34-year olds. **(Mark the ONE response that best applies)**

- the number 1
- the 2<sup>nd</sup>
- the 10<sup>th</sup>
- the 20<sup>th</sup>

7. Which of the following are common triggers of suicidal thoughts/feelings? **(Mark ALL responses that apply)**

- Break-up of a close relationship
- Drug/alcohol relapse
- Watching a sad movie
- Being drunk or high
- Watching a sad or depressing movie
- Going to church or a religious service

8. Which of the following are common among people who attempt suicide? (**Mark ALL responses that apply**)

- They are depressed
- They are drunk or high on drugs or alcohol before the attempt
- They have told someone they have been thinking about suicide
- They have children
- They have recently moved

9. If a person starts having thoughts of suicide, which of the following can be done to prevent a suicide attempt is: (**Mark ALL responses that best apply**)

- Telling a professional such as a mental health or addiction counselor
- Secure the means to commit suicide such as locking up firearms
- Keep the information to themselves
- Call a crisis line

10. Which of the following are the 2 most common risk factors of people who die by suicide? (**Mark the TWO responses that best apply**)

- Mental Illness
- Alcohol/Drug Addiction
- Lack of Housing
- Financial problems
- Sexual Orientation

11. Which of the following drugs are central nervous system depressants: (**Mark ALL responses that apply**)

- Alcohol
- Opiates such as heroin and pain pills
- Anti-anxiety drugs such as Xanax or valium
- Marijuana
- Amphetamines such as cocaine

12. People addicted to drugs or alcohol are approximately \_\_\_\_\_ times more likely to die from suicide than are people from the general population.

- 2 times
- 5 times
- 10 times
- 50 times

13. Suicide attempts are \_\_\_\_\_ in women than men.

- more common
- less common
- about as common

14. Death by suicide is \_\_\_\_\_ in men than in women.

- more common

- less common
- about as common

### SECTION 3: BEHAVIOR

**Directions:** Please answer the following questions based on your behavior during the past month.

In the past month (30 days), how many times have you...

- a. ...asked a friend to get help because you were worried that he or she was having suicidal thoughts/feelings?
  - 0 times (none)
  - 1 time
  - 2 times
  - 3 times
  - More than 3 times
  
- b. ...asked a family member to get help because you were worried that he or she having suicidal thoughts/feelings?
  - 0 times (none)
  - 1 time
  - 2 times
  - 3 times
  - More than 3 times
  
- c. ...asked for help because you were having suicidal thoughts/feeling?
  - None 0 times/None
  - 1 time
  - 2 times
  - 3 times
  - More than 3 times
  
- d. ... called a crisis line/suicide hotline?
  - 0 times (none)
  - 1 time
  - 2 times
  - 3 or more times
